# Supplementary material for: Efficacy and Safety of Acupuncture versus Sham in Patients with Chronic Sciatica: A Systematic review and Meta-analysis with GRADE assessment
Source: Research Square preprint supplement (doi:10.21203/rs.3.rs-6797552/v1), 2025-06-04
Supplement: Supplementary file 1 [file f930124030906fca3efb3957.docx]

**Supplementary table 1:** Search strategy term.

| Database | String | Number of results |
| --- | --- | --- |
| PubMed | ((Sciatic*) AND ((Acupuncture OR Pharmacoacupuncture OR Acupotom*)) | 207 |
| Web of Science | ((Sciatic*) AND ((Acupuncture OR Pharmacoacupuncture OR Acupotom*)) | 286 |
| Scopus | ((Sciatic*) AND ((Acupuncture OR Pharmacoacupuncture OR Acupotom*)) | 294 |
| Cochrane library | ((Sciatic*) AND ((Acupuncture OR Pharmacoacupuncture OR Acupotom*)) | 22 |
